# Supplementary material for: Engineered Hyperactive Integrase for Concerted HIV-1 DNA Integration
Source: PubMed Central journal article supplement (PMC4132020; doi:10.1371/journal.pone.0105078), 2014-08-13

Figure S1

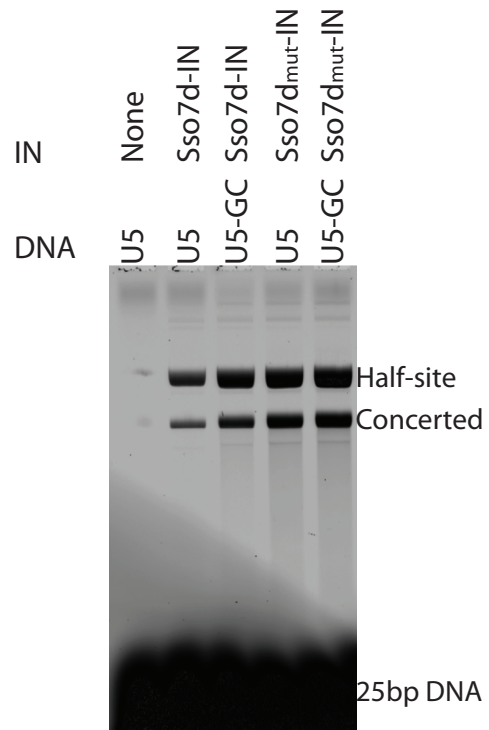

Supplement: pone.0105078.s001.pdf [file pone.0105078.s001.pdf]
